# Supplementary material for: Systematic characterization of cancer transcriptome at transcript resolution
Source: PubMed Central journal article supplement (PMC9649690; doi:10.1038/s41467-022-34568-z), 2022-11-10
Supplement: 41467_2022_34568_MOESM2_ESM.pdf [file 41467_2022_34568_MOESM2_ESM.pdf]

## Description of Additional Supplementary Files

**Supplementary Data 1.** The information of cancer cell lines used in this study.

**Supplementary Data 2.** The gene type or genomic regions of expressed transcripts.

**Supplementary Data 3.** Specificity scores and specific tissue types of transcripts.

**Supplementary Data 4.** The difference of transcripts upon knockdown of different RBPs.

**Supplementary Data 5.** The expression specificity of RBP genes and transcripts across different human tissues/cancer
